# Supplementary material
Source: publisher figshare collection journal article supplement (https://sage.figshare.com/ndownloader/files/13765250)

**Supplemental table 1. Bleeding definitions**

| Study                    | Major Bleeding                                                                                                                                                                                                                                                                       | Minor Bleeding                                                                                                                                                                                                                 | All bleeding                                                                                              |
|--------------------------|--------------------------------------------------------------------------------------------------------------------------------------------------------------------------------------------------------------------------------------------------------------------------------------|--------------------------------------------------------------------------------------------------------------------------------------------------------------------------------------------------------------------------------|-----------------------------------------------------------------------------------------------------------|
| <b>Allie et al</b>       | Drop in hemoglobin of $\geq 3$ g/dl, cerebrovascular accident, any complications requiring surgery, intracranial bleeding, retroperitoneal hematoma, $> 5$ cm groin hematoma, or $> 2$ units packed cell transfusion.                                                                | Non-intracranial or retroperitoneal bleeding, small ( $< 5$ cm) groin hematomas and transfusion of $\leq 2$ units packed cells.                                                                                                | Combination of major and minor bleeding was used                                                          |
| <b>Lin et al</b>         | Major groin or retroperitoneal bleeding requiring operative evacuation or blood transfusion                                                                                                                                                                                          |                                                                                                                                                                                                                                | Major bleeding was used                                                                                   |
| <b>Hallak et al</b>      | Hemorrhagic event leading to surgery or death, extended or unexpected hospitalization, intracranial hemorrhage, transfusion of $>2$ units of whole blood or packed red blood cells, a fall in hemoglobin (Hgb) $>5$ g/dl (or $>15\%$ of hematocrit) with no bleeding site identified | Drop in hemoglobin of $>3$ g/dl but $<5$ g/dl, with bleeding from a known site; a spontaneous gross hematuria, hemoptysis, or hematemesis; as well as any bleeding event that did not meet the criteria for a major hemorrhage | Combination of major and minor bleeding was used                                                          |
| <b>Sheikh et al</b>      | Intracranial or retroperitoneal hemorrhage, a fall in hemoglobin of 5 g/dl, and/or transfusion of 2 U of packed red blood cells (PRBCs) for any reason                                                                                                                               | Bleeding that did not meet the major bleeding criteria                                                                                                                                                                         | Combination of major and minor bleeding was used                                                          |
| <b>Stamler et al</b>     | Overt blood loss resulting in a decrease of hemoglobin level of more than 3 g/dL, any decrease in hemoglobin of more than 4 g/dL, transfusion of at least 2 U of whole blood or packed red blood cells, or intracranial or retroperitoneal hemorrhage                                | All hematomas that did not meet the criteria for major bleeding, transfusion of less than 2 U of packed red blood cells, or other non-intracranial or retroperitoneal bleeding                                                 | Combination of major and minor bleeding was used                                                          |
| <b>Shammas et al</b>     | Drop in hemoglobin .3 g/dL with a source of bleeding, any .4-g/dL decrease in hemoglobin, and/or intracranial or retroperitoneal bleeding                                                                                                                                            | Bleeding that did not meet the major bleeding criteria                                                                                                                                                                         | Combination of major and minor bleeding was used                                                          |
| <b>Stabile et al</b>     | Hemorrhagic stroke or if hematocrit decreased by 15 points or by 10 to 15 points with clinical bleeding                                                                                                                                                                              | Hematocrit decreased by 10 points with clinical bleeding or by 10 to 15 points without clinical bleeding                                                                                                                       | Combination of major and minor bleeding was used                                                          |
| <b>Geisbuch et al</b>    | Bleeding requiring any surgical or interventional repair, bleeding requiring any transfusion of whole blood or packed red blood cells, intracerebral hemorrhage and clinical bleeding with a hematocrit decrease of $>10$ points                                                     | onset of hematoma clinical bleedings with a hematocrit decrease of $<10$ points                                                                                                                                                | Combination of major and minor bleeding was used                                                          |
| <b>Wayangankar et al</b> |                                                                                                                                                                                                                                                                                      |                                                                                                                                                                                                                                | Procedure-related bleeding or hematoma requiring red blood cell transfusion, and intracerebral hemorrhage |

[illegible]

**Supplemental figure 1. Forest plot.** Comparison of subgroups according to anatomic location of intervention (Carotid versus other peripheral interventions) in patients undergoing peripheral interventions for all-cause mortality (A), all-bleeding (B), major bleeding (C), and access site complications (D) between bivalirudin versus heparin.

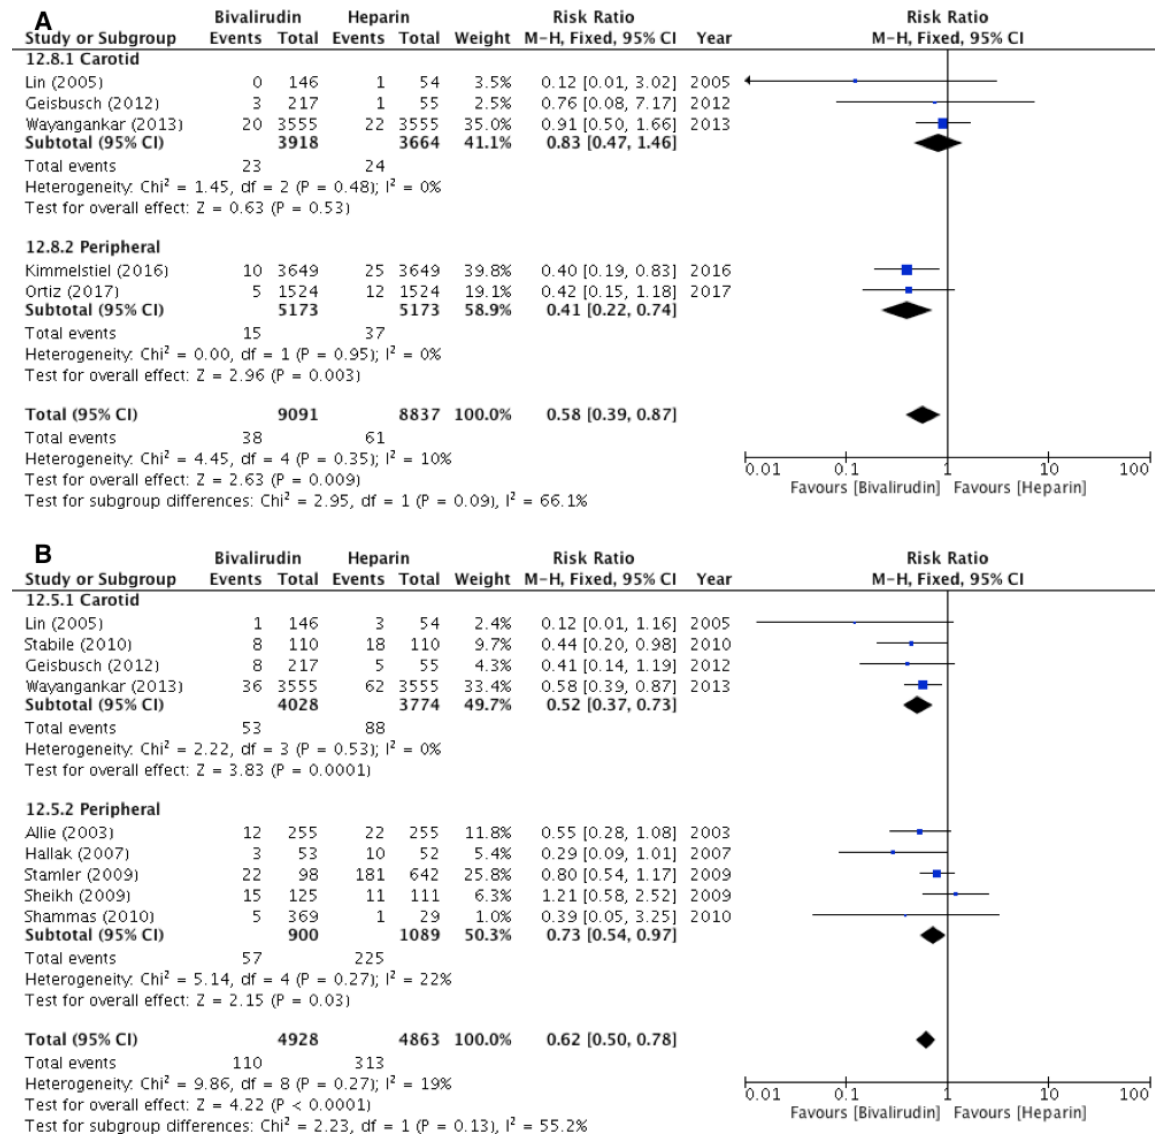

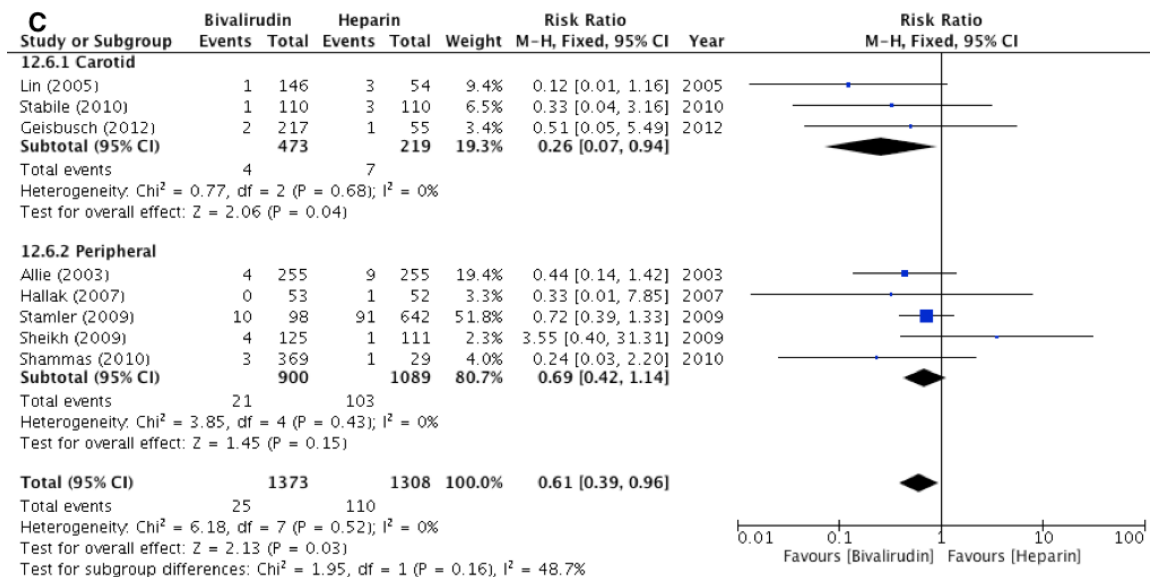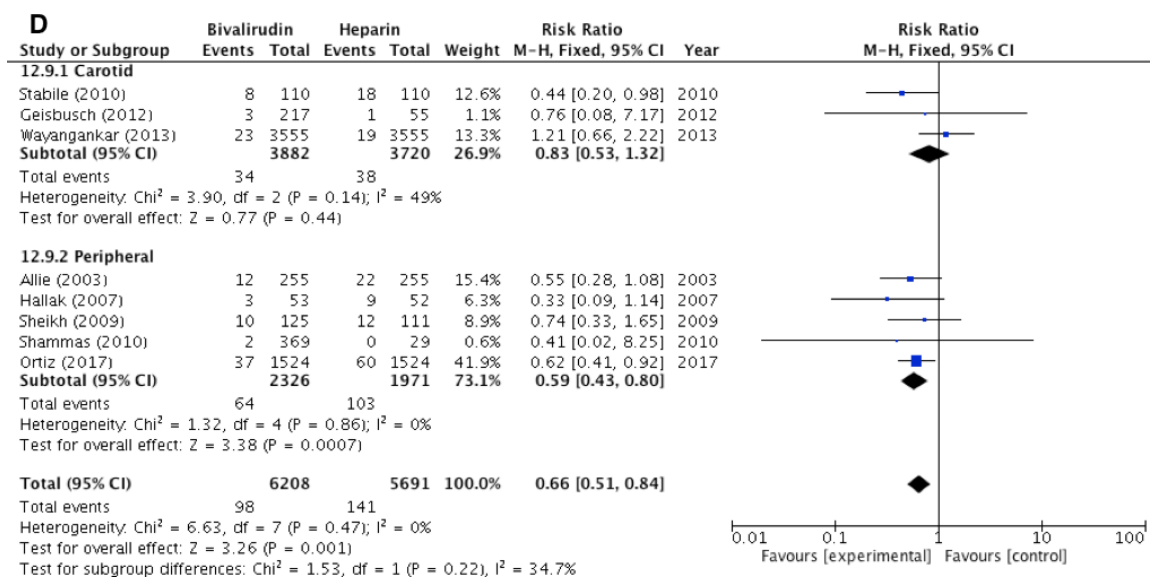

**Supplemental figure 2.** Comparison of subgroups according to study design (PSM versus non-PSM) in patients undergoing peripheral interventions for all-cause mortality (A), all-bleeding (B), major bleeding (C), and access site complications (D) between bivalirudin versus heparin.

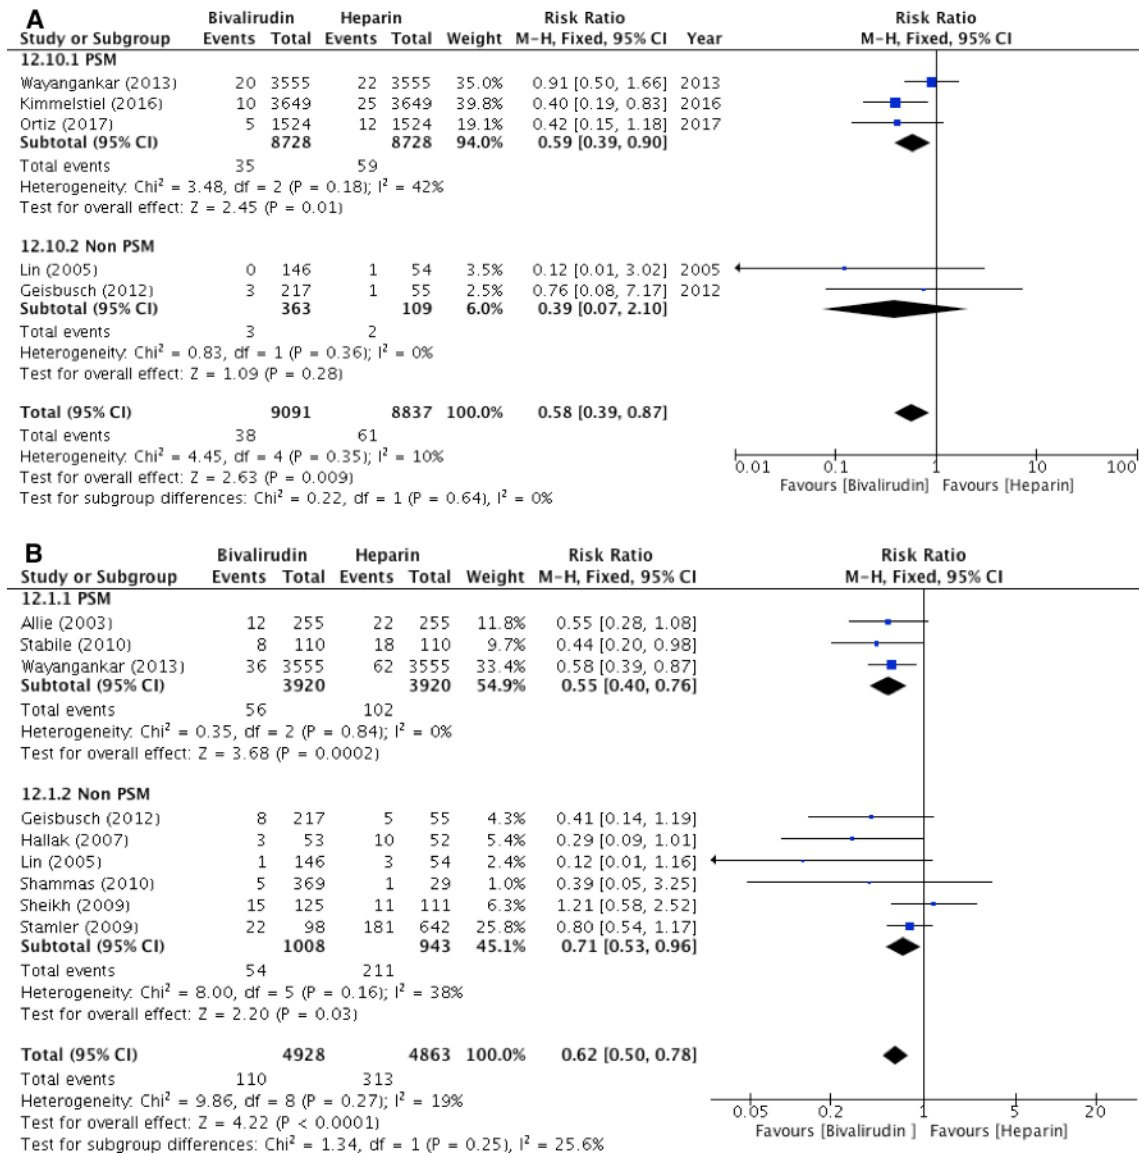

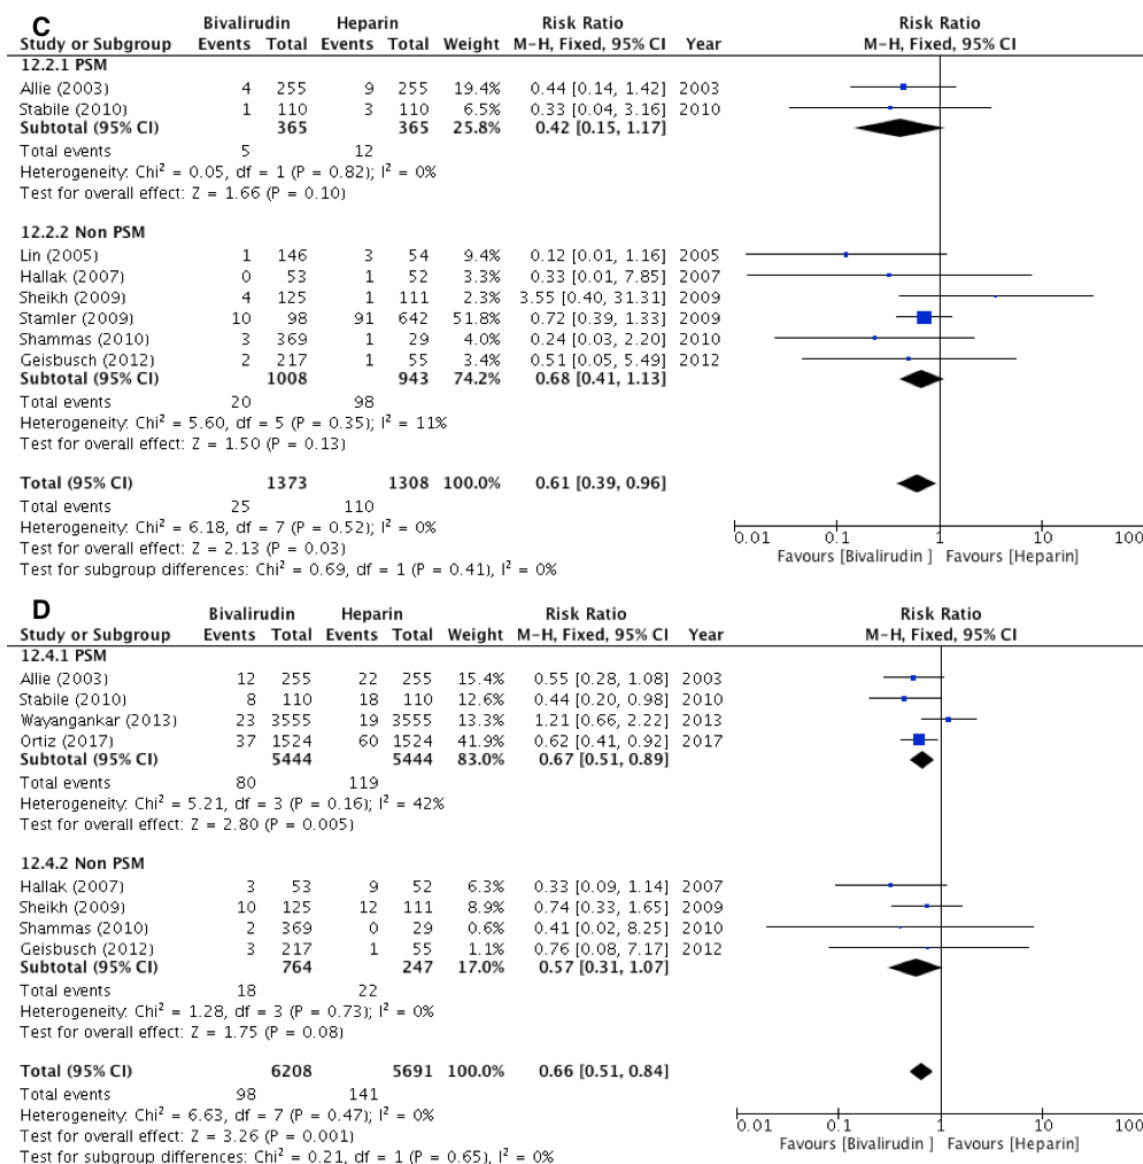

**Supplemental figure 3. Funnel plot.** Statistically significant outcomes. (A) All-cause mortality, (B) All-bleeding, (C) Major bleeding, (D) Minor bleeding, (E) Access site complications.

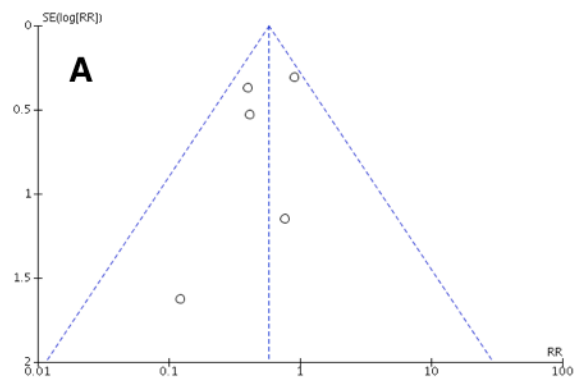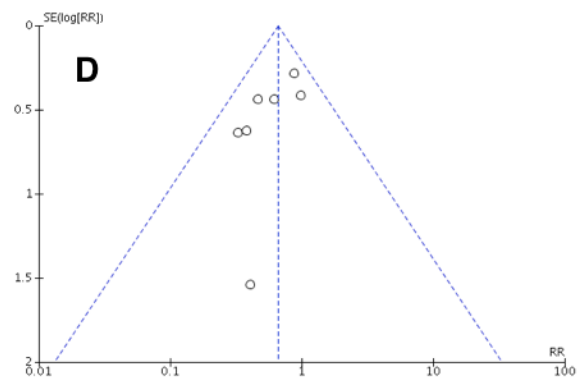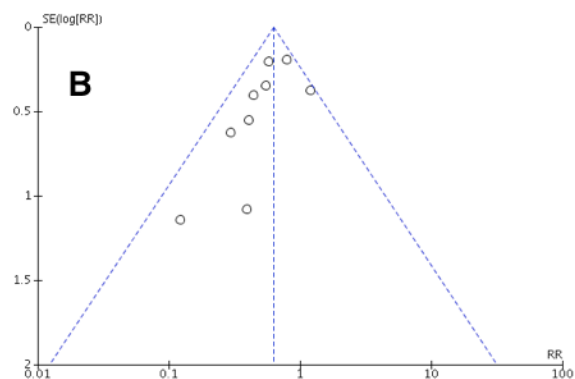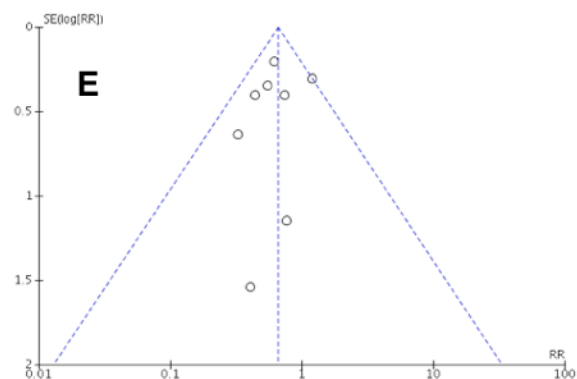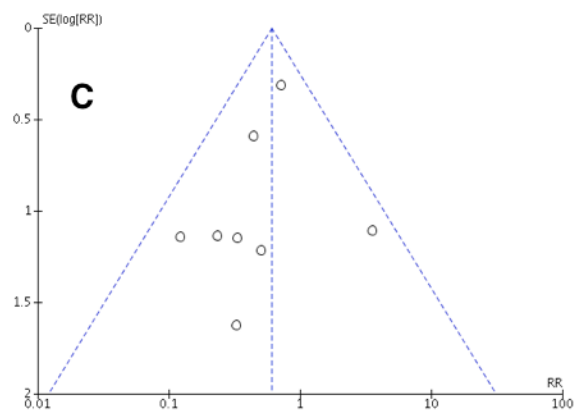

Supplement: Supplementary file 1 [file 13765250]
